# Supplementary material for: Fabrication of mesoporous silica nanospheres with radially oriented mesochannels by microemulsion templating for adsorption and controlled release of aspirin
Source: Royal Society of Chemistry journal article supplement (doi:10.1039/c4ra12291g), 2014-12-17
Supplement: c4ra12291g1.pdf [file c4ra12291g1.pdf]

## Supporting Information

### **Fabrication of Mesoporous Silica Nanospheres with Radially Oriented Mesochannels by Microemulsion Templating for Adsorption and Controlled Release of Aspirin**

Jinli Pang,<sup>a</sup> Xiuyan Li,<sup>ab</sup> Guowei Zhou,<sup>\*ab</sup> Bin Sun,<sup>a</sup> and Yingqin Wei<sup>a</sup>

*<sup>a</sup>Key Laboratory of Fine Chemicals in Universities of Shandong, School of Chemistry  
and Pharmaceutical Engineering, Qilu University of Technology, Jinan 250353,  
Shandong, People's Republic of China*

*<sup>b</sup>School of Chemical Engineering and Environment, Weifang University of Science  
and Technology, Weifang 262700, P. R. China*

\*Corresponding author: guoweizhou@hotmail.com (G. W. Zhou). Tel: +86 531 89631696

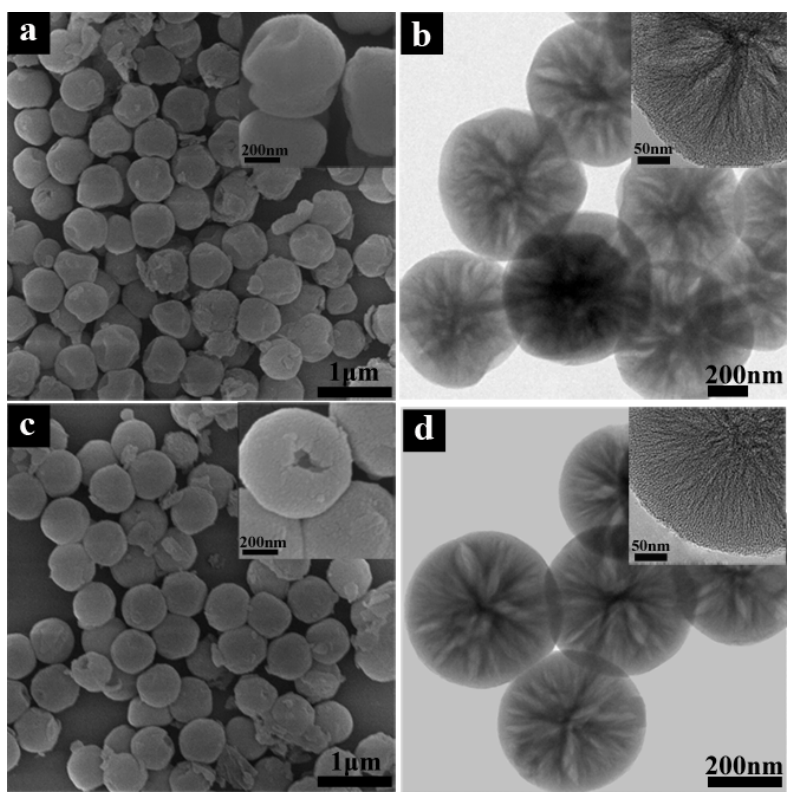

**Figure S1.** FESEM (a, c) and HRTEM (b, d,) images of MSNsV1 (a, b) and MSNsV3 (c, d), the insets are the corresponding magnified images of (a), (b), (c) and (d), respectively.

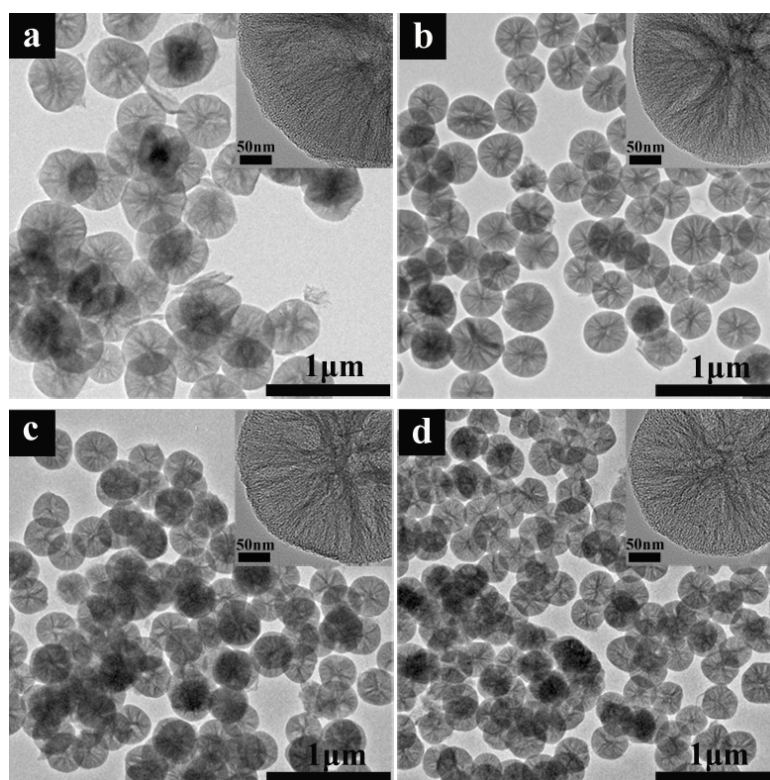

**Figure S2.** HRTEM images of MSNsM1 (a), MSNsM2 (b), MSNsM3 (c) and MSNsM4 (d), the insets are the corresponding magnified images of (a), (b), (c) and (d), respectively.

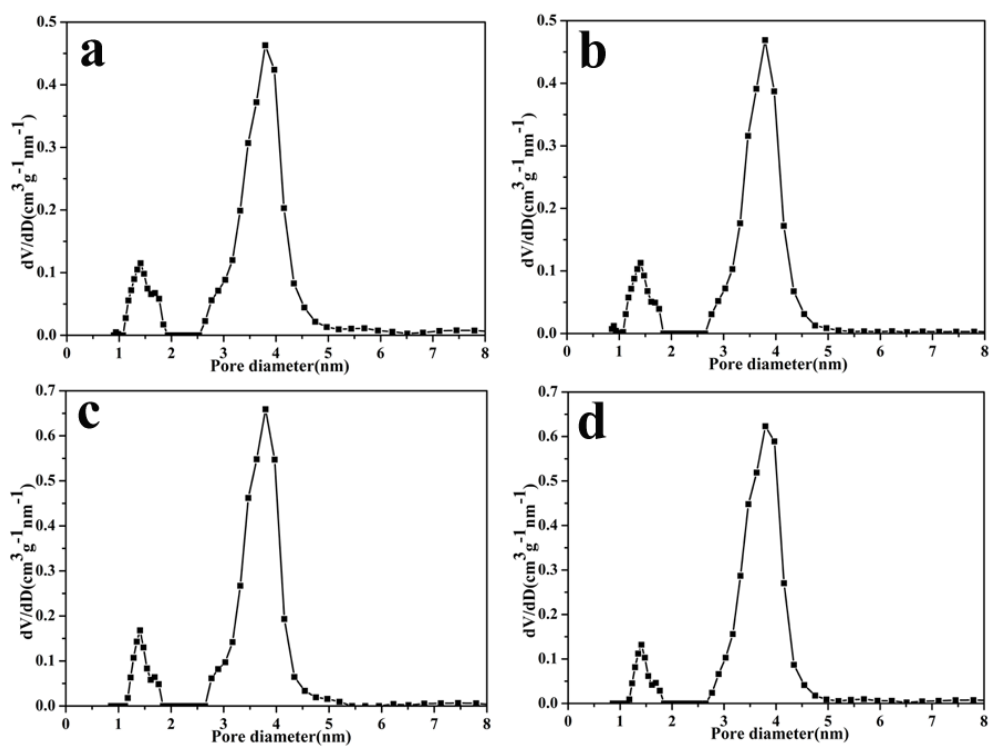

**Figure S3.** The pore size distribution (a, b, c, d) of MSNsV3 (a), MSNsV4 (b) MSNsM3 (c) and MSNsM4 (d)

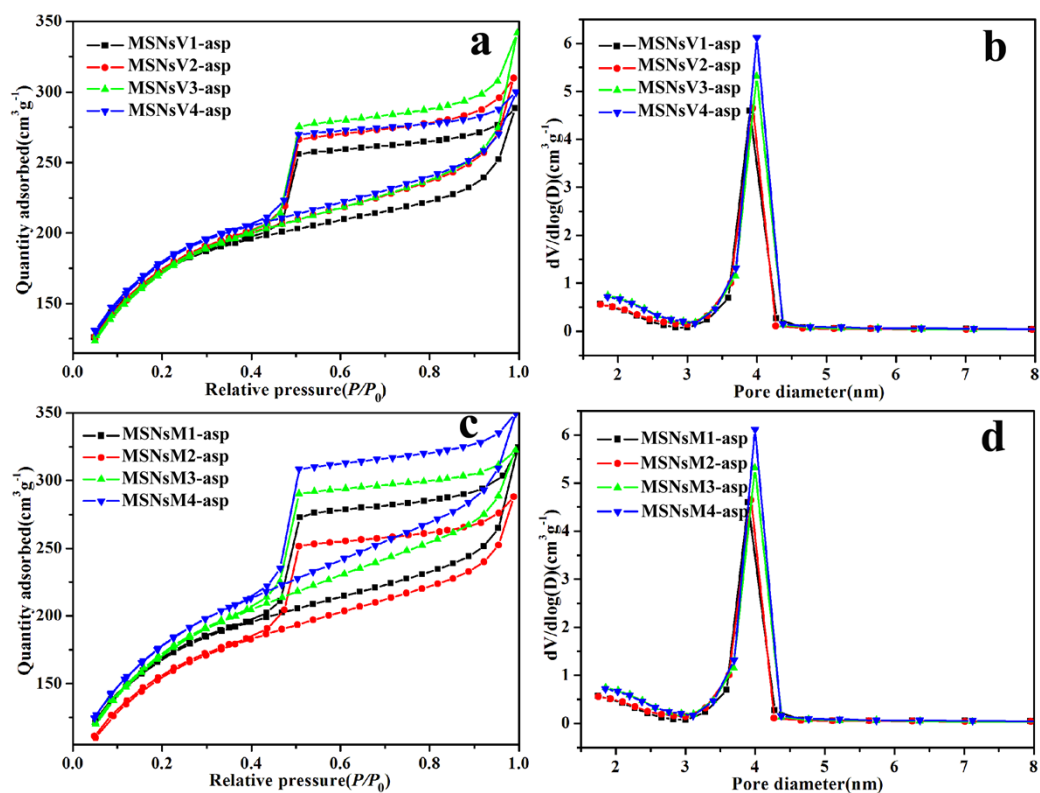

**Figure S4.** The N<sub>2</sub> adsorption-desorption isotherms (a, c) and corresponding BJH pore size distribution (b, d) of MSNsV1-4 (a, b) and MSNsM1-4 (c, d) after aspirin-loading

**Table S1** Physicochemical properties of the MSNs after aspirin (asp) loading

| Sample     | $S_{\text{BET}}$<br>( $\text{m}^2 \text{g}^{-1}$ ) <sup>a</sup> | $V$<br>( $\text{cm}^3 \text{g}^{-1}$ ) <sup>a</sup> | $D$<br>(nm) <sup>a</sup> | Asp loading<br>amounts (g) | Loading<br>content (%) | EE<br>(%) | RSD<br>(%) |
|------------|-----------------------------------------------------------------|-----------------------------------------------------|--------------------------|----------------------------|------------------------|-----------|------------|
| MSNsV1-asp | 619                                                             | 0.33                                                | 3.91                     | 0.327                      | 24.64                  | 87.75     | 2.84       |
| MSNsV2-asp | 627                                                             | 0.38                                                | 3.95                     | 0.358                      | 26.36                  | 86.58     | 3.97       |
| MSNsV3-asp | 622                                                             | 0.44                                                | 3.89                     | 0.497                      | 33.19                  | 81.36     | 3.16       |
| MSNsV4-asp | 645                                                             | 0.36                                                | 3.93                     | 0.467                      | 31.83                  | 82.24     | 3.68       |
| MSNsM1-asp | 609                                                             | 0.42                                                | 3.90                     | 0.502                      | 33.42                  | 81.18     | 1.59       |
| MSNsM2-asp | 564                                                             | 0.37                                                | 3.94                     | 0.538                      | 34.98                  | 79.83     | 2.43       |
| MSNsM3-asp | 628                                                             | 0.46                                                | 3.99                     | 0.542                      | 35.15                  | 79.68     | 3.42       |
| MSNsM4-asp | 650                                                             | 0.51                                                | 3.99                     | 0.572                      | 36.39                  | 78.55     | 2.47       |

<sup>a</sup> $D$ ,  $S_{\text{BET}}$ , and  $V$  stand for average BET pore diameter, surface area, and pore volume after aspirin loading, respectively.

Asp loading amounts stands for aspirin loading amount (g) /g MSNs.

EE stands for the encapsulation efficiency of aspirin in MSNs.

RSD stands for the relative standard deviation from the mean value.
